# Supplementary material
Source: PubMed Central journal article supplement (PMC3416211)
Supplement: JB.00352-12_zjb999091745so1.pdf [file JB.00352-12_zjb999091745so1.pdf]

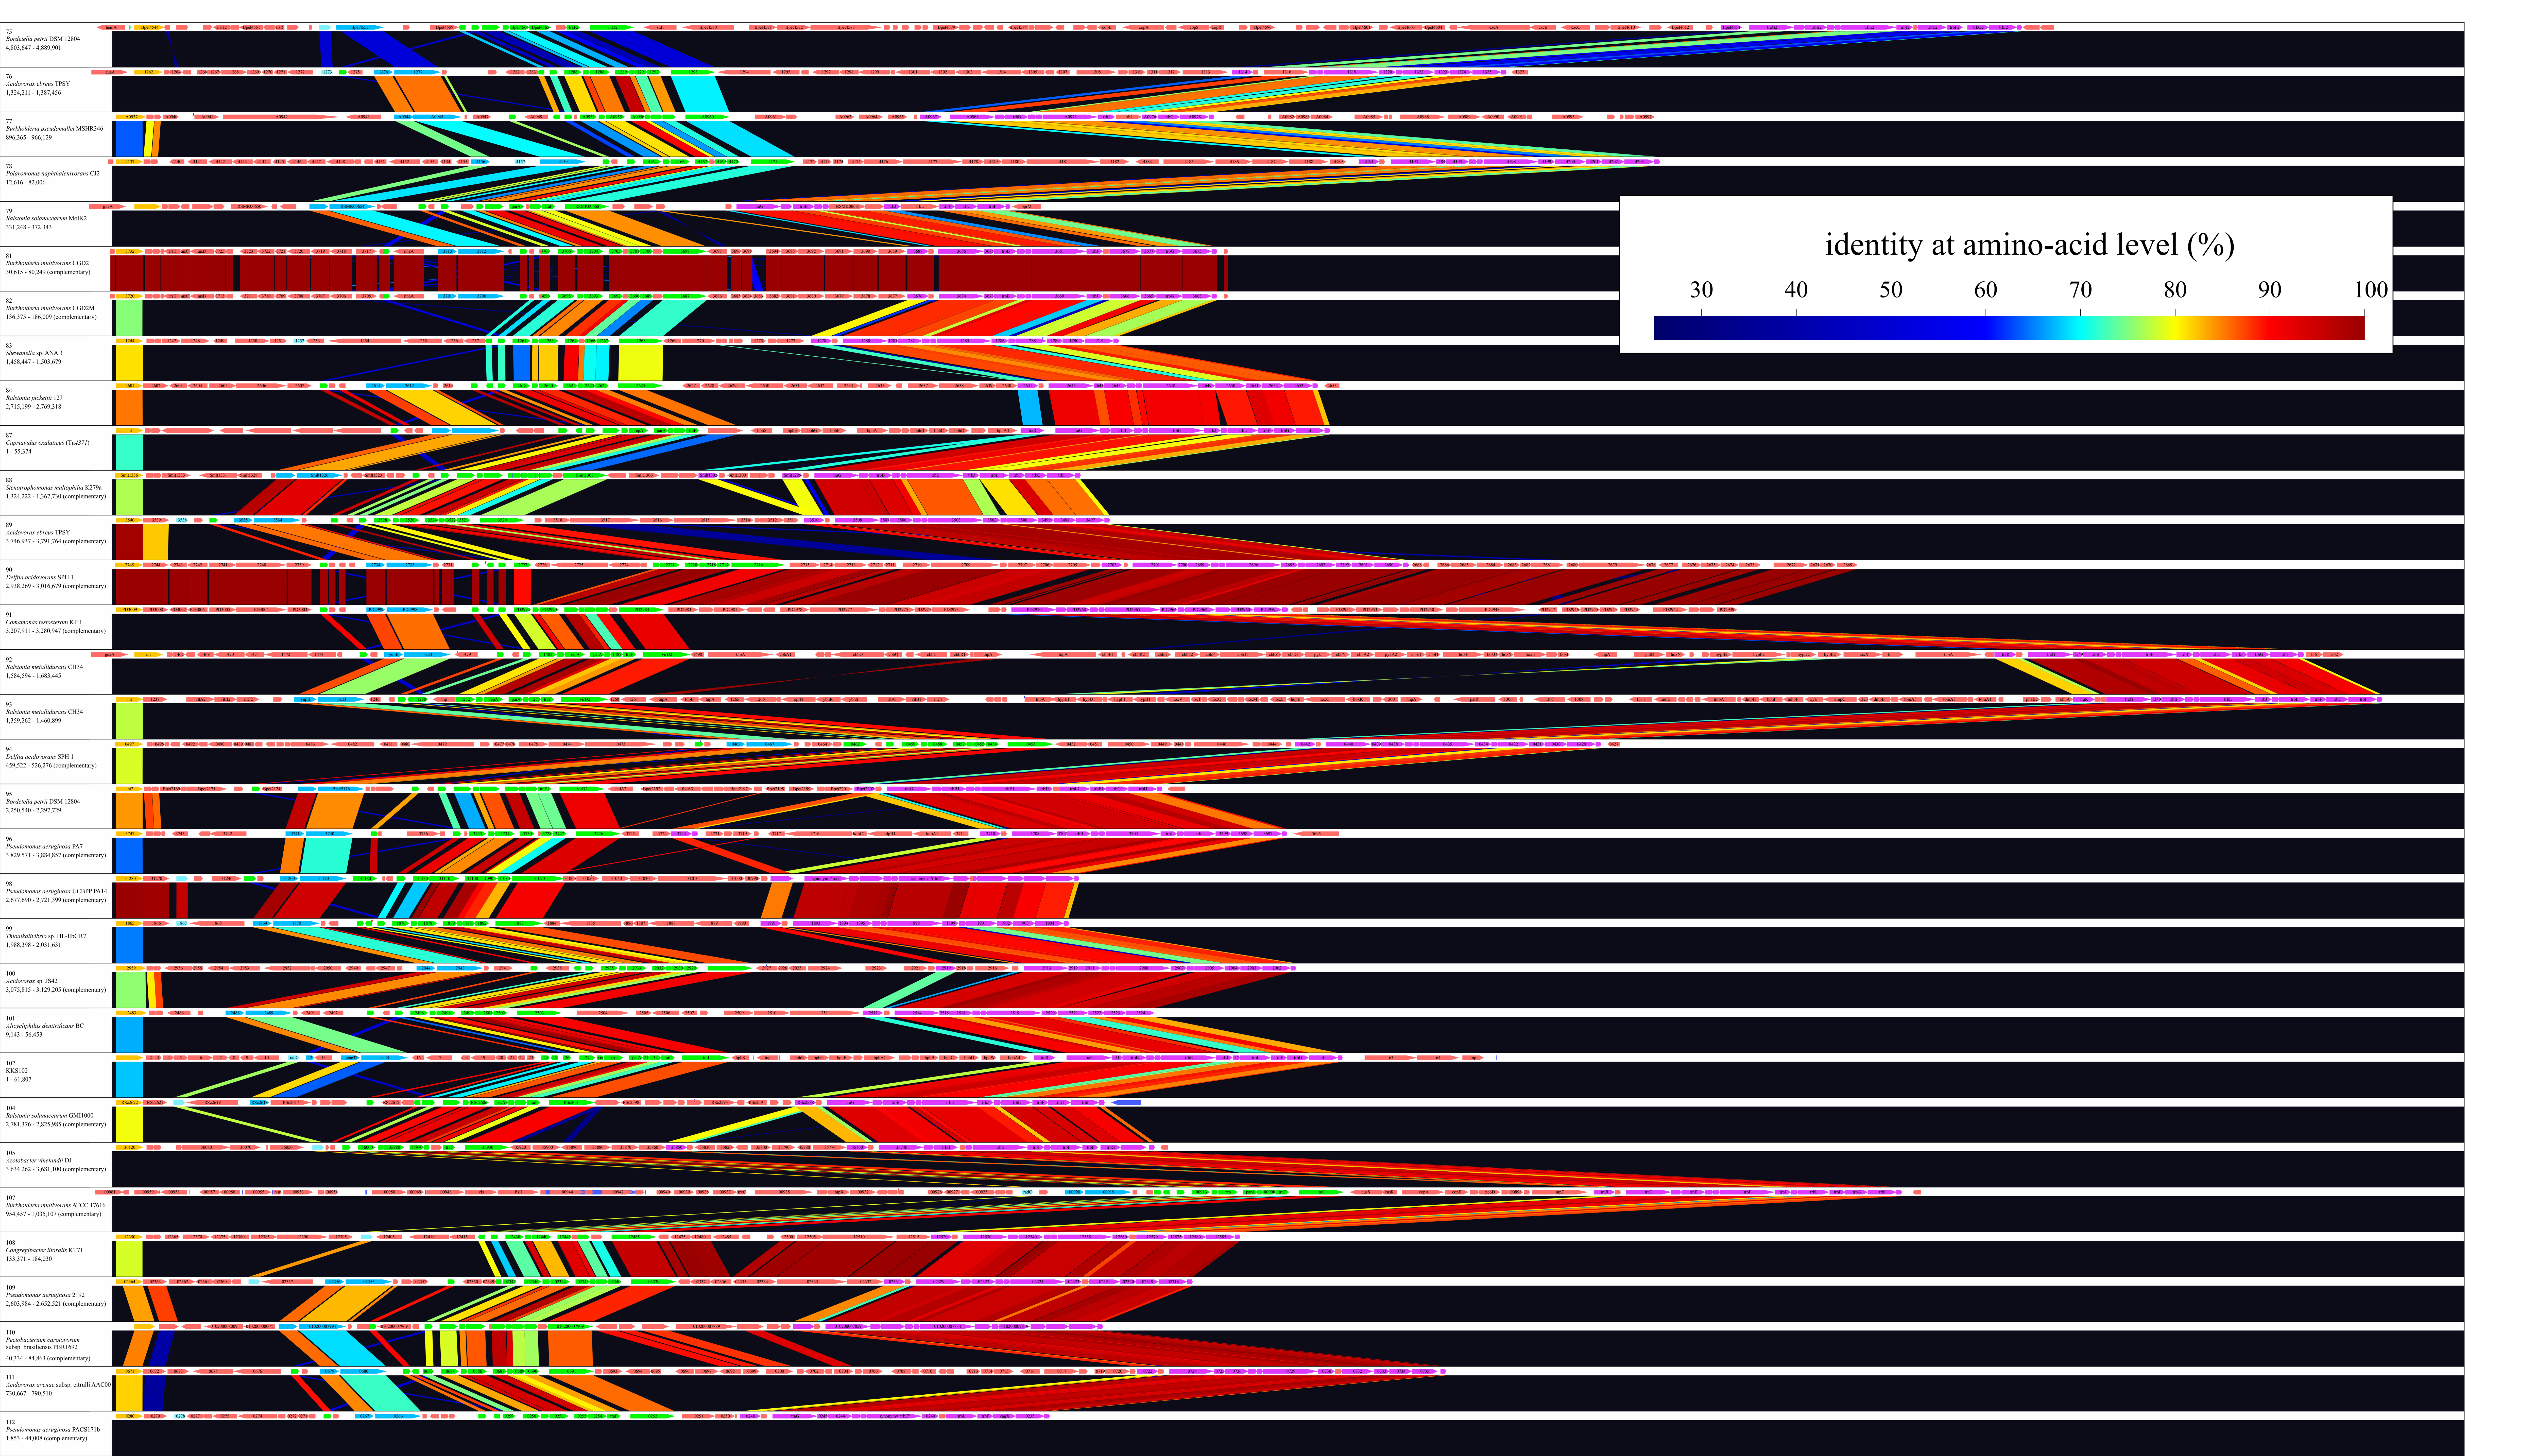

**Fig. S1 Comparative analysis of ICEs with *traG* that belonged to  $\beta$  and  $\gamma$  clusters.** Coding sequences (CDSs) present in a range of genomic sequences from one organism were blastp-compared to those in another. Detected similarities with query coverage greater than 50% and identity score greater than 30% are depicted with colored lines. The relationships between colors and identity scores are shown in the top-right area. CDSs in the *int*, *parB*, *parI*, and *mpf* blocks are shown in orange, cyan, green, and purple, respectively. *radC* is shown in pale cyan and *traR* is shown in purple. At the left of each panel, the sequence number and exact sequence range used for the analysis are indicated. See Supplementary Table S4 for sequence numbers, source organisms, and accession numbers. This figure was drawn by using a computational tool, CompareSequences, which is available at: <http://www.ige.tohoku.ac.jp/joho/gmProject/gmhome.html>.

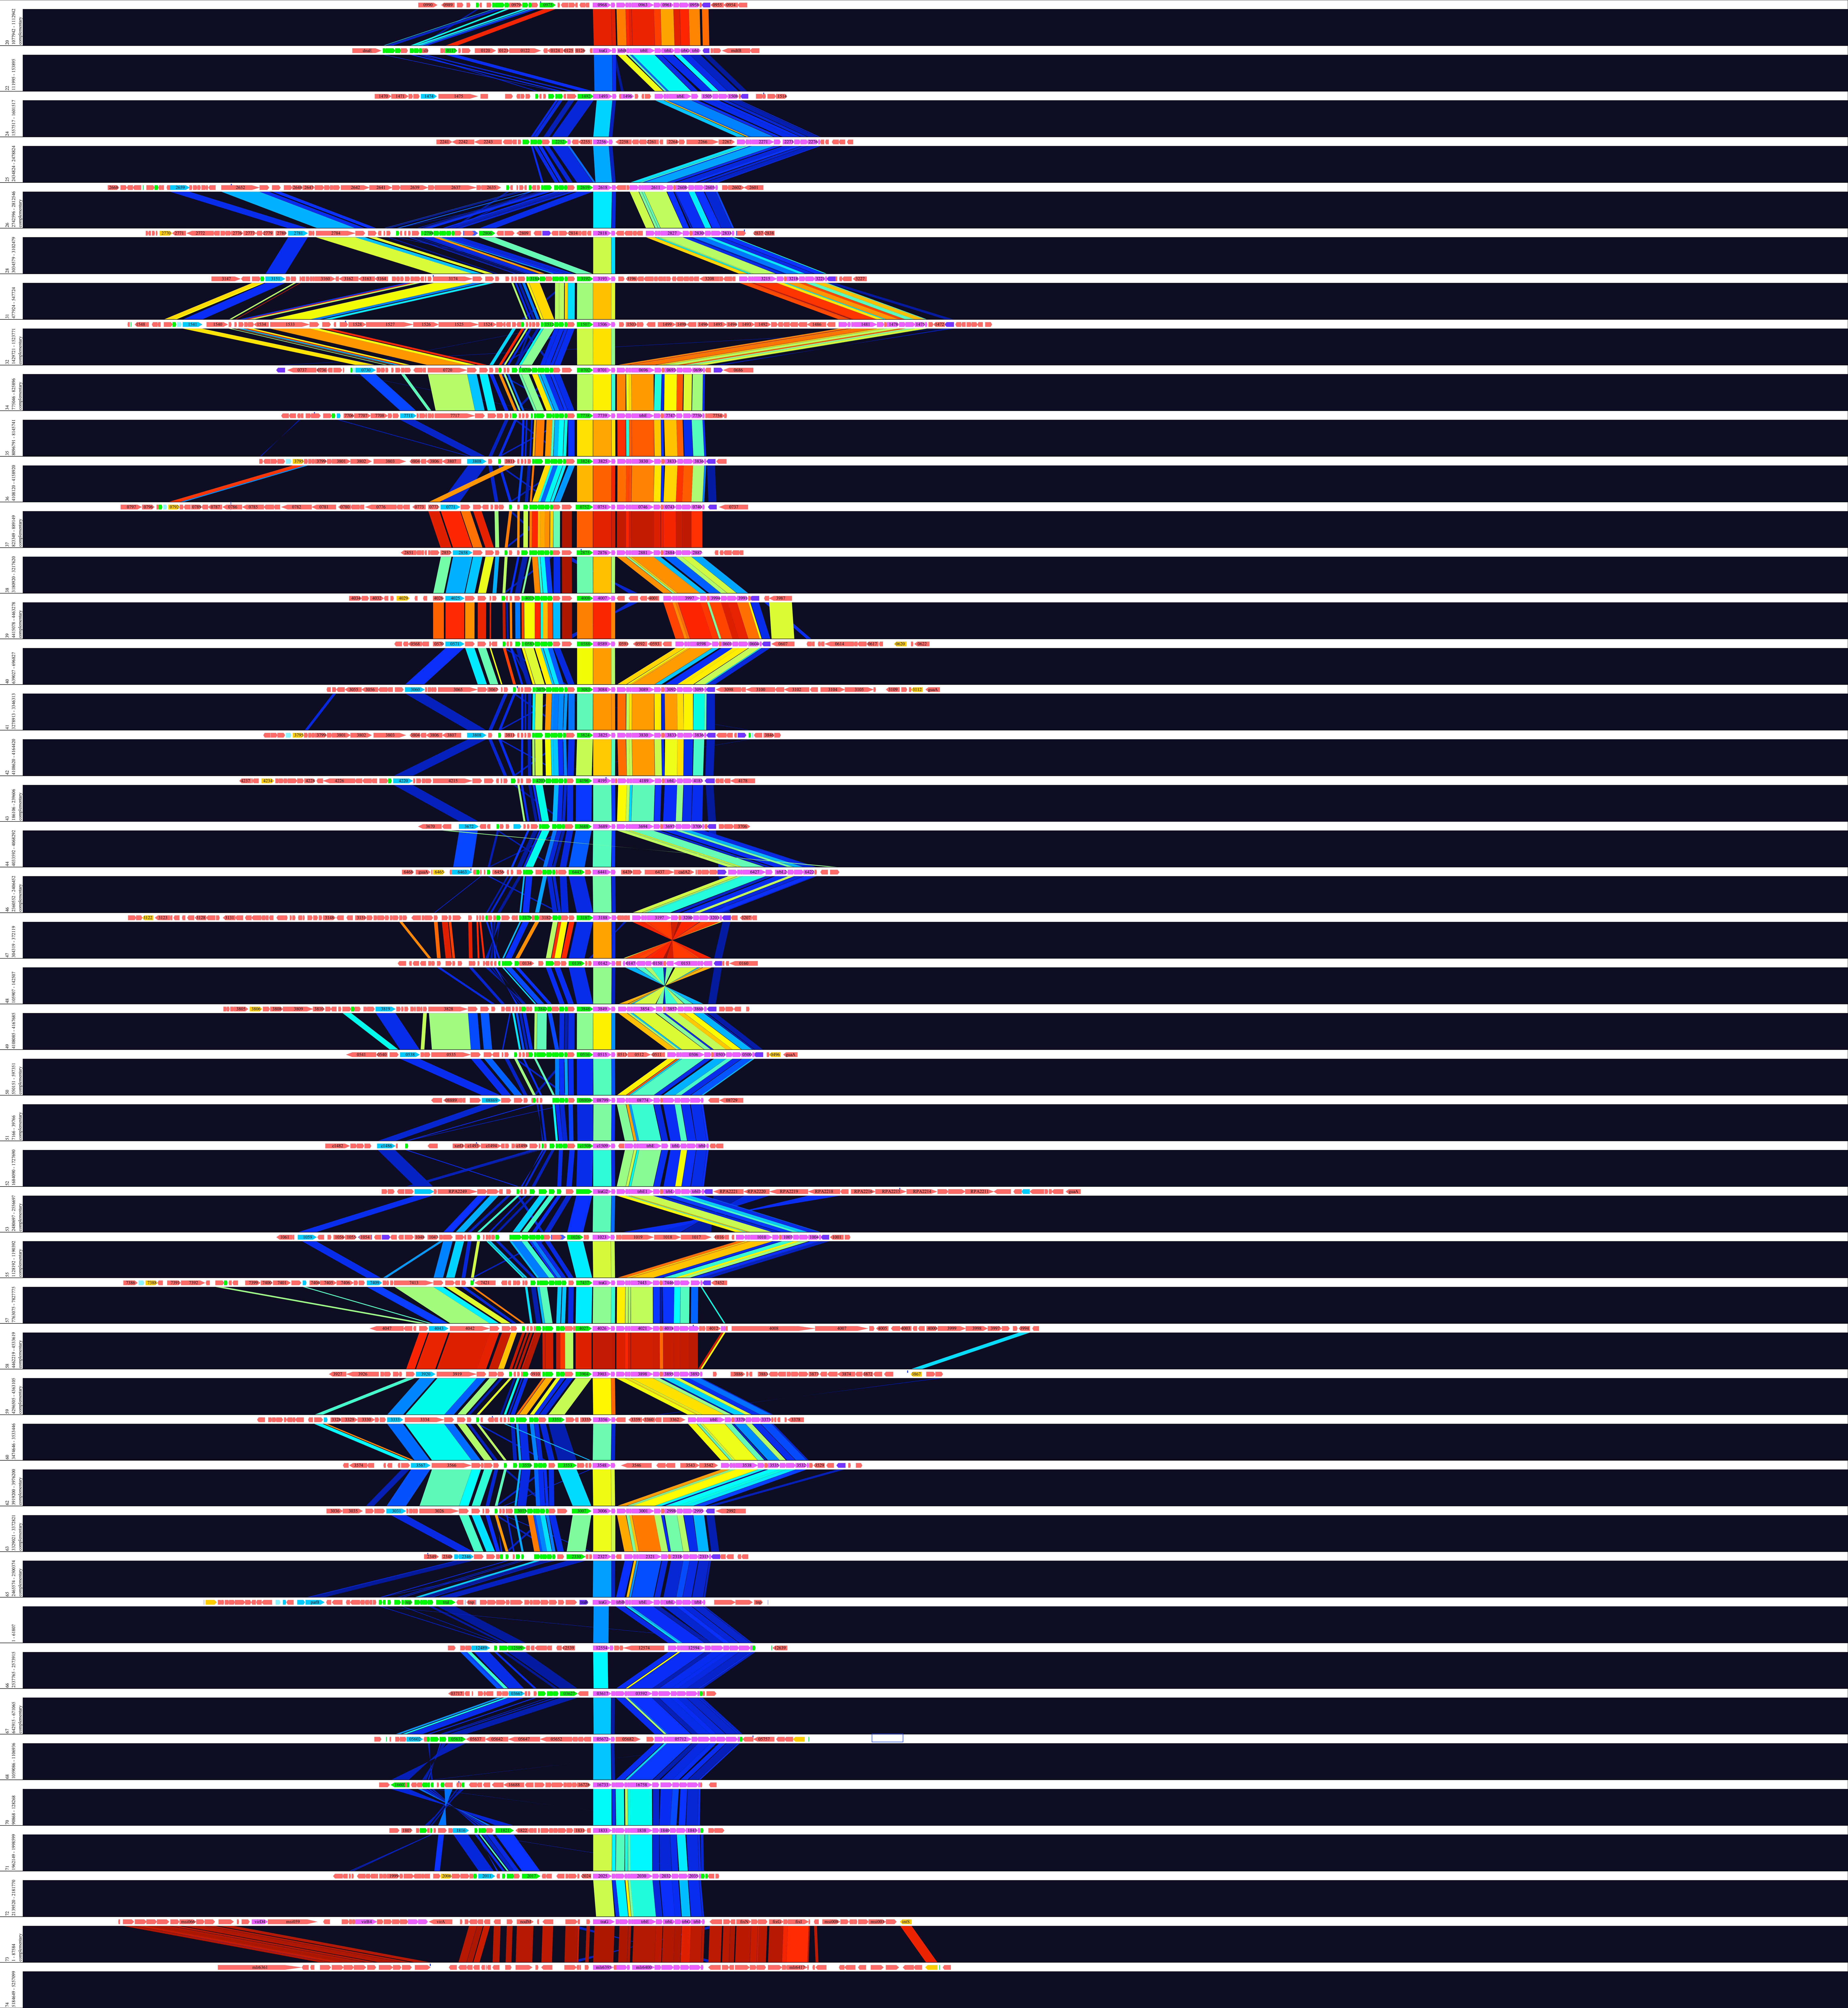

**Fig. S2 Comparative analysis of putative ICEs carrying traG belonging to  $\alpha$  clusters I and II.** See the legend to Fig. S1. TraG sequences not surrounded by typical ICE genes were omitted from the figure.

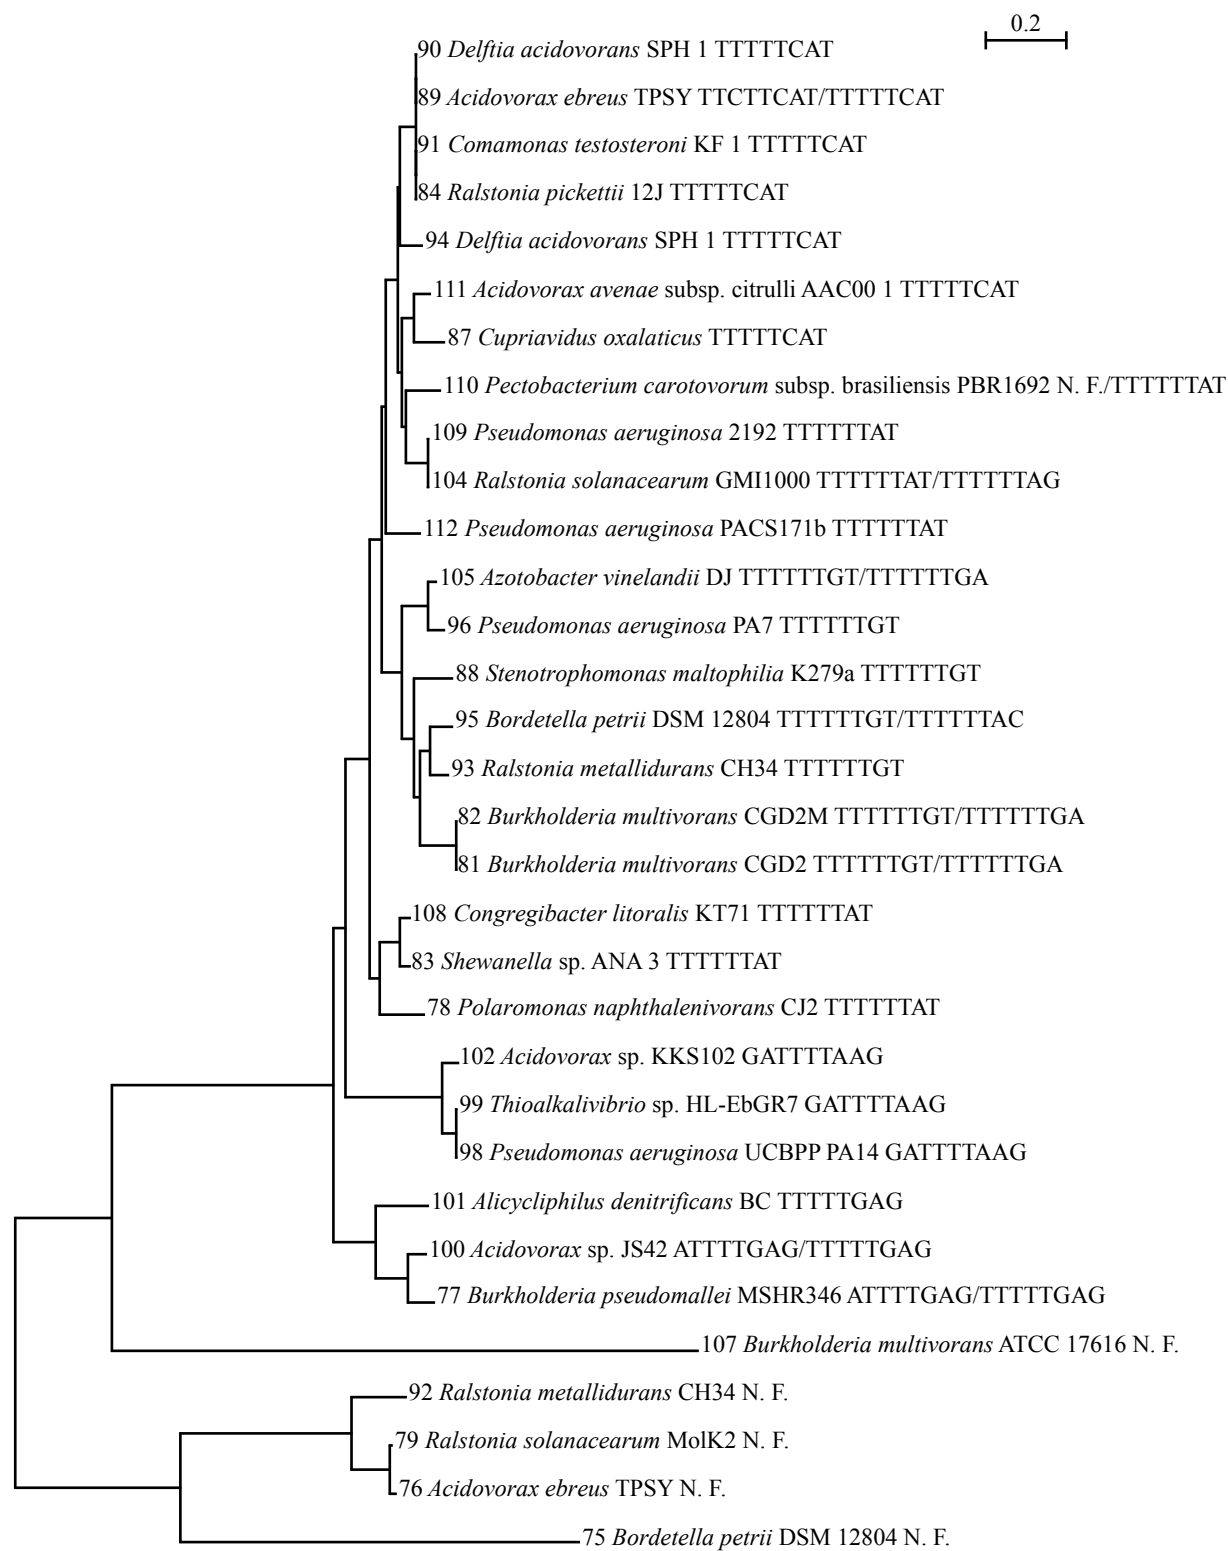

**Fig. S3 Phylogenetic tree of Int proteins of Tn4371-like elements from  $\beta$ - and  $\gamma$ -proteobacteria** Int protein sequences were aligned and a neighbor-joining tree was depicted by MAFFT (7). The strain names are followed by nucleotide sequences of att sites. In cases where the two sites are not identical, both sites are shown. N. F.: not found.
